# Supplementary material for: Genomic and phenotypic attributes of novel salinivibrios from stromatolites, sediment and water from a high altitude lake
Source: PubMed Central journal article supplement (PMC4094778; doi:10.1186/1471-2164-15-473), 2014-06-13
Supplement: 12864_2013_6227_MOESM5_ESM.pdf [file 12864_2013_6227_MOESM5_ESM.pdf]

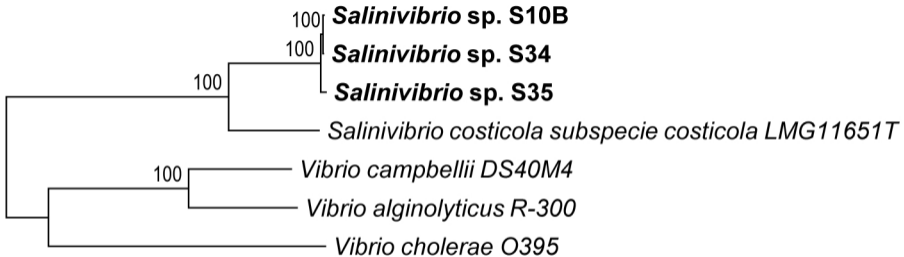

0.02
