# Supplementary material for: Genomic and phenotypic attributes of novel salinivibrios from stromatolites, sediment and water from a high altitude lake
Source: PubMed Central journal article supplement (PMC4094778; doi:10.1186/1471-2164-15-473), 2014-06-13
Supplement: 12864_2013_6227_MOESM6_ESM.pdf [file 12864_2013_6227_MOESM6_ESM.pdf]

10 20 30 40 50 60 70 80

S34 ..... - - - - - M E I E L L T L G - - - - - Q Y S F V Q N A F S F G F A V L A A A T L F F W L M K S E L A - A E Y R

S10B ..... - - - - - M E I E L L T L G - - - - - Q Y S F V Q N A F S F G F A V L A A A T L F F W L M K S E L A - A E Y R

S35 ..... - - - - - M E I E L L T L G - - - - - Q Y S F V Q N A F S F G F A V L A A A T L F F W L M K S E L A - A E Y R

XR ..... - - - - - M L Q E L P T L T P G - - - - - Q Y S L V F N M F S F T V A T M T A S F V F F V L A R N N V A - P K Y R

PR M E N L V K N F I P L L K W N R Q H N L H F K I P L V A S A T V F P N A A N A A A N L Q P N D F V G I S F W L I S M A L M A S T V F F L W E T Q G V T - A K W K

BR ..... - - - - - M L E L L P T A V E G - - - - - V S Q A Q I T G R P E W I W L A L G T A L M G L G T L Y F L V K G M G V S D P D A K

90 100 110 120 130 140 150 160

S34 L A V T I T G L V T A I A A Y H Y L S I M F S W N A A A D I T S G E V I A T G K P F N Q A Y R Y V D W L L T V P L L L I E L I L V M R L S K A E T I K K S T T L

S10B L A V T I T G L V T A I A A Y H Y L S I M F S W N A A A D I T S G E V I A T G K P F N Q A Y R Y V D W L L T V P L L L I E L I L V M R L S K A E T I K K S T T L

S35 L A V T I T G L V T A I A A Y H Y L S I M F S W N A A A D I T S G E V I A T G K P F N Q A Y R Y V D W L L T V P L L L I E L I L V M R L S K A E T I K K S T T L

XR I S M M V S A L V V F I A G Y H Y F R I T S S W E A A Y A L Q N G M Y Q P T G E L F N D A Y R Y V D W L L T V P L L T V E L L V M G L P K N E R G P L A A K L

PR T S L T V S A L V T L I A A V H Y F Y M R D V W V A T G E T P T - - - - - V Y R Y I D W L L T V P L L M I E F Y L I L R A I G A A S A G I F W R L

BR K F Y A I T T L V P A I A F T M Y L S M L L G Y G L T M V P F G G E Q N P - - - - - I Y W A R Y A D W L F T T P L L L L D L A L L V D A D Q G - - - - - T I L A L

170 180 190 200 210 220 230 240

S34 G G A A A L M I I L G Y P G E V S N - - - V G G L R F V F W V L S M I P F V Y I I Y Q L V V G L K - - E S I S Q Q P E S V K N L I K I S T Y L V I G S W L F Y P

S10B G G A A A L M I I L G Y P G E V S N - - - V G G L R F V F W V L S M I P F V Y I I Y Q L V V G L K - - E S I S Q Q P E S V K N L I K I S T Y L V I G S W L F Y P

S35 G G A A A L M I I L G Y P G E V S N - - - V G G L R F V F W V L S M I P F V Y I I Y Q L V V G L K - - E S I S Q Q P E S V K N L I K I S T Y L V I G S W L F Y P

XR G F L A A L M I V L G Y P G E V S E N A A L F G T R G L W G F L S T I P F W I L Y I L F T Q L G - - D T I Q R Q S S R V S T L L G N A R L L L L A T W G F Y P

PR L V G T L I M L I A G F L G E V G Y - - - - - I S V T V G F V I G M L G W F Y I L Y E I F L G E A G K A A K H Q A S D S V K F A Y N L M R W I V T V G W A I Y P

BR V G A D G I M I G T G L V G A L T K - - - V Y S Y R F V W W A I S T A A M L Y I L Y V L F F G F T - - S K A E S M R P E V A S T F K V L R N V T V V L W S A Y P

250 260 270 280 290 300 310

S34 I V Y L F P L V G L Q G G A A I T - - - - A V E I G Y T I A D I V A K A V F G L F I F V I A M R K S Q A L K E E R A T I E A A G D S D E M S T L S

S10B I V Y L F P L V G L Q G G A A I T - - - - A V E I G Y T M L T L - - - - -

S35 L S T F S R W L A C K V V L P S P - - - - L S K L V I P S L T L - - - - -

XR I A Y M I P M A F P E A F P S N T P G T I V A L Q V G Y T I A D V L A K A G Y G V L I Y N I A K A K S E E E G F N V S E M V E P A T A S A - - - - -

PR L G Y V L G Y M M G A V D D A S L N - - - - - L V Y N L A D V V N K I A F G L L I W Y A A T S E S Q D A K G - - - - -

BR V V W L I G S E G A G I V P L N I E T - - - - - L L F M V L D V S A K V G F G L I L L R S R A I F G E A E A P E P S A G D G A A A T S D - - - - -
